# Supplementary material for: Continuous photocatalytic preparation of hydrogen peroxide with anthraquinone photosensitizers
Source: Royal Society of Chemistry journal article supplement (doi:10.1039/d4gc02385d), 2024-01-01
Supplement: d4gc02385d1.pdf [file d4gc02385d1.pdf]

## Supplementary Information

### Continuous photocatalytic preparation of hydrogen peroxide with anthraquinone photosensitizers

*Zongyi Yu <sup>a,†</sup>, Shichang Li <sup>a,†</sup>, Yufeng Wu <sup>a</sup>, Cunfei Ma <sup>a</sup>, Jianing Li <sup>a</sup>, Liyuan Duan <sup>a</sup>, Zunchao Liu <sup>a</sup>,  
Huinan Sun <sup>a</sup>, Guofeng Zhao <sup>a</sup>, Yue Lu <sup>a</sup>, Qilei Liu <sup>a,\*</sup>, Qingwei Meng <sup>a,b,\*</sup>, and Jingnan Zhao <sup>a,\*</sup>*

<sup>a</sup>State Key Laboratory of Fine Chemicals, Frontiers Science Center for Smart Materials Oriented Chemical Engineering, Department of Pharmacy, School of Chemical Engineering, Dalian University of Technology, Dalian 116024, China

<sup>b</sup>Ningbo Institute of Dalian University of Technology, Dalian University of Technology, Ningbo 315000, China

\*: Corresponding author

†: Equivalent to first author

E-mail: mengqw@dlut.edu.cn

## Contents

|                                                              |    |
|--------------------------------------------------------------|----|
| 1. Synthesis of 2,6-Di-tert-butylanthraquinone.....          | 3  |
| 2. Determination of H <sub>2</sub> O <sub>2</sub> : .....    | 5  |
| 3. The catalyst recycling process .....                      | 10 |
| 4. Screen of intermittent reaction condition screening. .... | 11 |
| 5. Calculations about residence time <sup>5</sup> .....      | 16 |
| 6. Reaction process detection and mechanism exploration..... | 16 |
| 7. DFT-Calculation details .....                             | 19 |
| 8. NMR spectrum.....                                         | 19 |
| 9. Reagents used in the experimental section.....            | 21 |

Number of Pages: 22;

Number of Figures: 6;

Number of Tables: 9;

## 1. Synthesis of 2,6-Di-tert-butylanthraquinone

### Alkylation of Anthracene for the Synthesis of 2,6-Di-tert-butylanthracene.

The synthesis of 2,6-di-tert-butyl anthracene involved the reflux of anthracene with tert-butyl alcohol in trifluoroacetic acid as a solvent for 24 hours<sup>1</sup>, as depicted in **Fig. S1**.

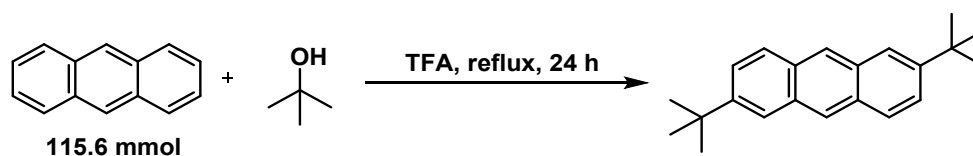

**Fig. S1** Preparation of 2, 6-di-tert-butylanthracene by alkylation of anthracene.

In a 250 mL round-bottom flask, a mixture of 115.6 mmol (20.6 g) of anthracene, 334.6 mmol (24.8 g) of tert-butyl alcohol, and 150 mL of trifluoroacetic acid was prepared. The mixture was then heated to 120 °C and refluxed for 24 hours. After terminating the reaction, the reaction mixture was allowed to cool to room temperature. Subsequently, 20 mL of ice water and 20 mL of petroleum ether were introduced to quench the reaction. The entire system was then transferred to a 1000 mL beaker, and 260 mL of distilled water was added. Sodium bicarbonate was incrementally added to neutralize any excess acid. Subsequently, the system was transferred to a separatory funnel and washed repeatedly with organic phase using distilled water and saturated saline solution. After washing, the organic phase was filtered through a Büchner funnel under reduced pressure. The filter cake was washed with ice-cold petroleum ether, yielding a white solid powder. The filter cake was then transferred to a surface dish and dried in a vacuum oven at 50 °C for 12 hours. Finally, the white powdered product, 2,6-di-tert-butylanthracene, was obtained with a yield of 15.96 g, corresponding to a 47.5% yield.

## Oxidative Synthesis of 2,6-Di-tert-butylanthraquinone (DBAQ) from 2,6-Di-tert-butylanthracene

In a 500 mL round-bottom flask, 55.0 mmol (15.96 g) of 2,6-di-tert-butylanthracene and 160 g of glacial acetic acid were combined. The reaction mixture was then heated to 124 °C and maintained at this temperature for 15 minutes before cooling it to room temperature<sup>2</sup> (Fig.S2).

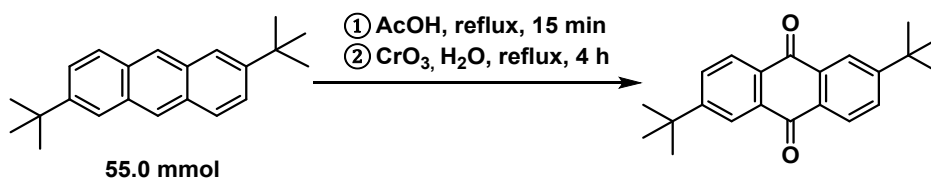

**Fig. S2** Preparation of 2, 6-di-tert-butylanthraquinone by oxidation of 2, 6-di-tert-butylanthracene.

A solution composed of 24 mL of distilled water, 160 g of ice-cold acetic acid, and 153.6 mmol (15.36 g) of chromium trioxide (CrO<sub>3</sub>) was added to the flask. The reaction was then refluxed at 110 °C for 4 hours. After heating was stopped and the reaction mixture was cooled to room temperature, 80 mL of ice water was added to quench the reaction.

The reaction mixture was filtered using a Büchner funnel to isolate green crystals. These crystals were subsequently washed, first with hot water and then with a 1 M NaOH solution in separate batches. During this process, the solid transitioned from green to pale yellow. Finally, the solid was transferred to a surface dish after a wash with ice-cold water. It was then subjected to drying in a vacuum oven at 50°C for 12 hours, resulting in the production of 14.78g of yellow crystalline product, 2,6-di-tert-butylanthraquinone, with a yield of 84.0%.

## 2. Determination of H<sub>2</sub>O<sub>2</sub>, oxidation products of HADs and calculation of H<sub>2</sub>O<sub>2</sub> production rate:

### 2.1 Iodometry redox titration<sup>3,4</sup>

### 2.1.1 Preparation of Solutions:

(1) 2M H<sub>2</sub>SO<sub>4</sub>: Take 98 mL distilled water in a narrow-mouth bottle using a measuring cylinder. Using a dry measuring cylinder, measure 25 mL of 98% concentrated sulfuric acid and slowly add it to the water.

(2) Ammonium molybdate solution: Weigh 3.18 g of analytical grade ammonium molybdate and dissolve it in 100 mL of water.

(3) Na<sub>2</sub>S<sub>2</sub>O<sub>3</sub> solution: Weigh 12.5g of analytical grade Na<sub>2</sub>S<sub>2</sub>O<sub>3</sub> and place it in a wide-mouth bottle. Boil 500 mL of distilled water and allow it to cool to room temperature. Pour the cooled water into the wide-mouth bottle and add a small amount of analytical grade Na<sub>2</sub>CO<sub>3</sub> (approximately 0.1g) to adjust the pH to between 9-10. Store the prepared solution in a light-protected area for one week before use.

(4) KI solution: Weigh 10 g of analytical grade KI and dissolve it in 100 mL of distilled water. Set it aside.

(5) Starch solution: Weigh 2.92 g of analytical grade NaCl and dilute it with distilled water to make a 0.1 M standard NaCl solution. Dissolve 3 g of soluble starch in 50 mL of the standard NaCl solution to make a suspension. Then, while stirring, add this suspension to 300 mL of boiling standard NaCl solution.

### 2.1.2 Solution Calibration:

(1) Na<sub>2</sub>S<sub>2</sub>O<sub>3</sub> Solution:

Weigh 0.15 g of potassium dichromate, dried to a constant weight at 120°C. Accurately measure 0.0001 grams of the potassium dichromate and transfer it to a 500 mL conical flask. Add 30 mL of distilled water. After complete dissolution of the potassium dichromate, add 12 mL of 2 M H<sub>2</sub>SO<sub>4</sub> and 20 mL of KI solution. Immediately cover the flask with a watch glass to prevent iodine

evaporation and place it in a light-protected area for 7 minutes. After 5 minutes, dilute the solution with distilled water and calibrate it using Na<sub>2</sub>S<sub>2</sub>O<sub>3</sub> solution. Once the solution in the conical flask turns orange, add 1.5 mL of starch solution and continue titrating until the solution changes from blue to bright green.

Reaction equation:

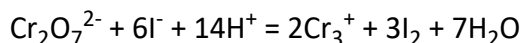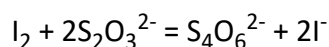

The concentration of Na<sub>2</sub>S<sub>2</sub>O<sub>3</sub> solution is calculated using the following formula:

$$C_{\text{Na}_2\text{S}_2\text{O}_3} = \frac{W \times 6 \times 1000}{294.2 \times V} \times 100\%$$

W— the mass of potassium dichromate (g)

V— the volume of Na<sub>2</sub>S<sub>2</sub>O<sub>3</sub> solution used (mL)

(2) H<sub>2</sub>O<sub>2</sub> Calibration:

The quantification of H<sub>2</sub>O<sub>2</sub> in the experiment was carried out through iodometry redox titration, and it was verified by KMnO<sub>4</sub> redox titration. The specific procedure is as follows: Take 0.2 g of the sample and transfer it to a beaker. Add three drops of 5% ammonium molybdate solution ((NH<sub>4</sub>)<sub>6</sub>Mo<sub>7</sub>O<sub>24</sub>·4H<sub>2</sub>O) as the color developer, followed by the addition of H<sub>2</sub>SO<sub>4</sub> (5.0 mL, 2.0 M) and KI solution (4.0 mL, 100.0 g L<sup>-1</sup>). Cover the beaker with a watch glass and let it stand in a dark environment for 5 minutes. Subsequently, a Na<sub>2</sub>S<sub>2</sub>O<sub>3</sub> standard solution (0.10 M) was used for the redox titration of the generated I<sub>2</sub>. When the color of the solution changes to light yellow, 1.0 mL of starch solution (10.0 g/L) is added, and the titration is continued until the dark blue color disappears and no longer reappears within 2 minutes. Reaction equation:

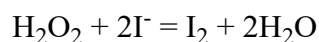

The concentration of H<sub>2</sub>O<sub>2</sub> solution is calculated using the following formula:

$$wt.(H_2O_2) = \frac{M(H_2O_2) \times c(Na_2S_2O_3) \times V}{1000 \times 2 \times W} \quad (a)$$

$$c(H_2O_2) = \frac{wt.(H_2O_2) \times \rho(HADS) \times 10^6}{M(H_2O_2)} \quad (b)$$

$V$ —the volume of the  $Na_2S_2O_3$  titration solution (mL)

$W$ —the mass of the  $H_2O_2$  containing solution (g)

$\rho$  (HADS)—the density of the hydrogen atom donor (g/mL)

## 2.2 $KMnO_4$ redox titration

### 2.2.1 Preparation of Solutions:

(1) 2 M  $H_2SO_4$ : Take 98 mL distilled water in a narrow-mouth bottle using a measuring cylinder. Using a dry measuring cylinder, measure 25 mL of 98% concentrated sulfuric acid and slowly add it to the water. Allow it to cool and set it aside.

(2) 0.02 M Standard  $KMnO_4$  solution: Weigh 1.6 g of  $KMnO_4$  and dissolve it in an appropriate amount of water. Heat the solution to boiling for 20-30 minutes, then allow it to cool. Place the solution in a dark location for 7-10 days. Afterward, remove impurities such as  $MnO_4$  by filtration using a glass sand core funnel or glass fiber filter. Store the filtrate in a clean, glass-stoppered brown bottle and keep it in a dark place.

### 2.2.2 Solution Calibration:

(1)  $KMnO_4$  solution: Accurately weigh 0.2 g of  $Na_2C_2O_4$  reference substance in a 250mL conical flask. Add approximately 20 mL of water to dissolve it. Then add 10mL of 2 M  $H_2SO_4$  solution and heat it to  $80^\circ C$ . Immediately titrate with the calibrated  $KMnO_4$  solution until the solution turns pale pink and remains stable for 60 seconds, indicating the endpoint. Perform 2 or 3 parallel determinations. Based on the volume of  $KMnO_4$  solution consumed and the mass of the reference substance, calculate the concentration of the  $KMnO_4$  solution.

Reaction equation:

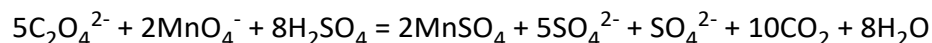

The concentration of  $\text{H}_2\text{O}_2$  solution is calculated using the following formula:

$$C_{\text{KMnO}_4} = \frac{W \times 5 \times 1000}{134.0 \times 2 \times V} \times 100\%$$

W— the mass of the  $\text{Na}_2\text{C}_2\text{O}_4$  containing solution (g)

V— the volume of the  $\text{KMnO}_4$  titration solution (mL)

(2)  $\text{H}_2\text{O}_2$  Calibration:

Using a pipette, extract 10 mL of the hydrogen peroxide sample (approximately 30% concentration) and transfer it to a 250 mL volumetric flask. Dilute with water to the mark, ensuring thorough mixing. Then, pipette 20 mL of the diluted solution into a 250 mL conical flask. Add 20 mL of water and 20 mL of  $\text{H}_2\text{SO}_4$  solution. Titrate the solution with the standard  $\text{KMnO}_4$  solution until it turns pink and remains stable for 30 seconds, indicating the endpoint. Based on the volume of  $\text{KMnO}_4$  standard solution used, calculate the mass fraction of  $\text{H}_2\text{O}_2$  in the undiluted hydrogen peroxide sample.

Reaction equation:

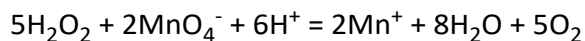

The concentration of  $\text{H}_2\text{O}_2$  solution is calculated using the following formula:

$$\text{wt.}(\text{H}_2\text{O}_2) = \frac{2 \times M(\text{H}_2\text{O}_2) \times c(\text{KMnO}_4) \times V}{5 \times W \times 1000} \times 100\% \quad (\text{c})$$

W— the mass of the  $\text{H}_2\text{O}_2$  containing solution (g)

V— the volume of the  $\text{KMnO}_4$  titration solution (mL)



## 2.3 Determination of the oxidation products of HADs

The composition of the reaction endpoint solution, whether under batch or continuous flow strategies, can be analyzed using gas chromatography (GC) or gas chromatography-mass spectrometry (GC-MS). Since hydrogen atom donors (HADs) also serve as solvents in this photocatalytic strategy, and in excess, even under optimal conditions (isopropanol-DBAQ system), the content of the oxidation product acetone in the endpoint H<sub>2</sub>O<sub>2</sub> solution is only 4.7% (detected by GC). The oxidation products of other types of HADs can also be quantitatively detected using gas chromatography. (GC conditions: FID detector, FFAP gas chromatography column, GC-2014 Shimadzu Co., Ltd.)

## 2.4 Calculation of H<sub>2</sub>O<sub>2</sub> production rate

### 2.4.1 Calculation of H<sub>2</sub>O<sub>2</sub> production rate under intermittent conditions

First, the concentration of H<sub>2</sub>O<sub>2</sub> (mmol/L) in the solution at the reaction endpoint is measured using the titration methods described in sections 2.1 and 2.2. The H<sub>2</sub>O<sub>2</sub> production rate (mmol/L/h or mM/h) under intermittent photocatalytic conditions is then obtained by dividing the concentration of H<sub>2</sub>O<sub>2</sub> at the endpoint by the actual reaction time.

$$r_{H_2O_2} (mM/h) = \frac{c(H_2O_2)}{Reaction\ time(h)} \quad (d)$$

### 2.4.2 Calculation of H<sub>2</sub>O<sub>2</sub> production rate under continuous flow strategy

First, the concentration of the H<sub>2</sub>O<sub>2</sub> solution (mmol/L) at the reaction endpoint is measured using the titration method described in sections 2.1 and 2.2. The production rate of H<sub>2</sub>O<sub>2</sub> under continuous flow strategy (mM/h or mM/min) is then obtained by dividing the concentration of the H<sub>2</sub>O<sub>2</sub> solution at the reactor outlet by the retention time for single-pass photocatalysis (eq. d), the retention time can be measured using a stopwatch and corrected by calculation (Section 5).

### 2.4.3 Calculation of space-time yield (STY) under continuous flow strategy

Space-time yield (STY) refers to the amount of the target product obtained per unit volume of the apparatus per unit time. For this continuous flow strategy, the formula for calculating STY is as follows:

$$STY_{(H_2O_2)} (mol/L \cdot h) = \frac{r(H_2O_2) \times t \times V(H_2O_2)}{t \times V(retention) \times 1000} \quad (e)$$

$r(H_2O_2)$ — $H_2O_2$  production rate (mM/h)

$t$ —retention time(h)

$V(H_2O_2)$  —volume of  $H_2O_2$  solution produced in the retention time (L)

$V(retention)$ —retention volume of the reactor (L)

### 3. The catalyst recycling process

All the catalysts used in this manuscript are homogeneous catalysts. After the reaction, they are dissolved in the solvent and recovered for reuse.

(1) Collect 300 mL of the reaction solution from the reactor outlet (main components are isopropanol, 2,6-di-tert-butylanthraquinone,  $H_2O_2$ , and acetone) and transfer it to a 500 mL rotary evaporation flask. Concentrate the reaction solution to 30 mL using a rotary evaporator, resulting in the precipitation of a large amount of light yellow crystals.

(2) Add 50 mL of ice-cold pure water and transfer the concentrate to a 150 mL flask. Stir the mixture overnight at 0°C to allow complete crystallization.

(3) Filter the concentrate using a Büchner funnel while cold. Wash the obtained filter cake three times with 20 mL of ice-cold pure water each time, then transfer it to a watch glass. Dry it in a vacuum oven at 50°C for 12 hours. The resulting catalyst is 2,6-di-tert-butylanthraquinone, with an actual mass of 1.18 g (3.68 mmol) and a theoretical mass of 1.26 g (3.92 mmol), yielding a recovery rate of 93.6%.

### 4. Screen of intermittent reaction condition screening.

**Table S1.** Catalyst investigation and control experiments.

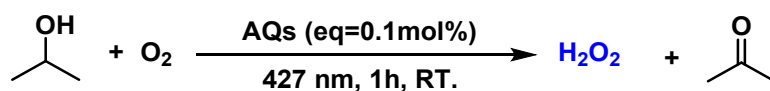

| Entry <sup>a</sup> | Conditions            | H <sub>2</sub> O <sub>2</sub> (wt%) | Generation rate of H <sub>2</sub> O <sub>2</sub> (mM/h) |
|--------------------|-----------------------|-------------------------------------|---------------------------------------------------------|
| 1                  | DAAQ                  | 0.03                                | 7.9                                                     |
| 2                  | Emodin                | 0.07                                | 15.6                                                    |
| 3                  | HAQ                   | 0.07                                | 16.0                                                    |
| 4                  | Alizarin              | 0.09                                | 20.3                                                    |
| 5                  | 1,8-DCAQ              | 0.07                                | 15.3                                                    |
| 6                  | TX                    | 0.09                                | 20.3                                                    |
| 7                  | DBrAQ                 | 0.19                                | 42.8                                                    |
| 8                  | CAQ                   | 0.63                                | 144.1                                                   |
| 9                  | DCAQ                  | 0.71                                | 163.3                                                   |
| 10                 | BrAQ                  | 0.92                                | 210.2                                                   |
| 11                 | AQ                    | 1.01                                | 230.6                                                   |
| 12                 | TAAQ                  | 1.92                                | 440.8                                                   |
| 13                 | EAQ                   | 2.02                                | 463.8                                                   |
| 14                 | BAQ                   | 2.10                                | 481.1                                                   |
| 15                 | MAQ                   | 2.29                                | 525.7                                                   |
| 16                 | DBAQ                  | 2.71                                | 621.2                                                   |
| 17                 | DBAQ + Air            | 0.08                                | 18.2                                                    |
| 18                 | DBAQ + N <sub>2</sub> | N.D.                                | N.D.                                                    |
| 19                 | Dark                  | N.D.                                | N.D.                                                    |
| 20                 | Without DBAQ          | 0.05                                | 10.9                                                    |

<sup>a</sup> Unless otherwise specified, isopropanol **1a** (2.33 g, 38.7 mmol), photocatalyst (0.0387 mmol, 0.1 mol %) were added to 10 mL vial equipped with a stirring bar. The mixture was sonicated to dissolve completely. Then, the mixture was stirred under O<sub>2</sub> atmosphere with exposure to 40 W Blue LED light (427 nm) at room temperature for 1 h.

**Table S2.** Selection of light source.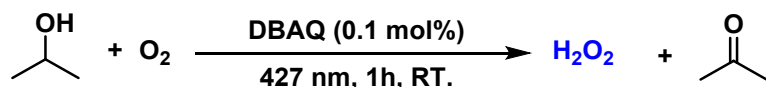

| Entry | Wavelength (nm)      | H <sub>2</sub> O <sub>2</sub> (wt%) | Generation rate of H <sub>2</sub> O <sub>2</sub> (mM/h) |
|-------|----------------------|-------------------------------------|---------------------------------------------------------|
| 1     | 370nm (40 W LED)     | 1.54                                | 356.3                                                   |
| 2     | 390nm (40 W LED)     | 1.75                                | 403.8                                                   |
| 3     | 427nm (40 W LED)     | 2.58                                | 591.6                                                   |
| 4     | 456nm (40 W LED)     | 0.36                                | 82.2                                                    |
| 5     | 467nm (40 W LED)     | 0.14                                | 32.4                                                    |
| 6     | >320nm(300W Xe Lamp) | 1.55                                | 356.8                                                   |

<sup>a</sup> Unless otherwise specified, isopropanol **1a** (2.33 g, 38.7 mmol), DBAQ (0.0387 mmol, 0.1 mol %) were added to 10 mL vial equipped with a stirring bar. The mixture was sonicated to dissolve completely. Then, the mixture was stirred under O<sub>2</sub> atmosphere with exposure to different kinds of light sources at room temperature for 1 h.

**Table S3.** Screen of the loading of catalyst.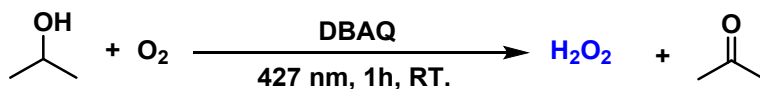

| Entry | DBAQ  | H <sub>2</sub> O <sub>2</sub> (wt%) | Generation rate of 2a (mM/h) |
|-------|-------|-------------------------------------|------------------------------|
| 1     | 0.03% | 1.42                                | 327.6                        |
| 2     | 0.07% | 2.29                                | 528.3                        |
| 3     | 0.1%  | 2.71                                | 621.2                        |
| 4     | 0.2%  | 2.57                                | 592.8                        |
| 5     | 0.3%  | 2.33                                | 538.1                        |
| 6     | 0.5%  | 1.89                                | 436.4                        |
| 7     | 0.75% | 2.25                                | 519.6                        |
| 8     | 1%    | 1.08                                | 249.4                        |
| 9     | 2%    | 1.10                                | 254.0                        |

<sup>a</sup> Unless otherwise specified, isopropanol **1a** (2.33 g, 38.7 mmol), different equivalents of DBAQ (0.03 mol %—2.0 mol%) were added to 10 mL vial equipped with a stirring bar. The mixture was

sonicated to dissolve completely. Then, the mixture was stirred under O<sub>2</sub> atmosphere with exposure to 40W Blue LED light (427 nm) at room temperature for 1 h.

**Table S4.** Investigation of HADs.

| Entry <sup>a</sup> | HADs                | 2a(wt%) | Generation rate of 2a<br>(mM/h) |
|--------------------|---------------------|---------|---------------------------------|
| 1                  | 1-Phenylethanol     | 0.10    | 30.1                            |
| 2                  | Benzyl alcohol      | 0.13    | 39.7                            |
| 3                  | 1-Phenylpropanol    | 0.20    | 60.1                            |
| 4                  | 2-Phenylethanol     | ND.     | ND.                             |
| 5                  | Cyclohexanol        | 0.03    | 8.54                            |
| 6                  | Ethanol             | 2.10    | 487.1                           |
| 7                  | Isopropanol         | 2.69    | 621.2                           |
| 8                  | n-Butanol           | 1.52    | 361.9                           |
| 9                  | Isobutanol          | 1.29    | 307.2                           |
| 10                 | 3-Chloro-1-propanol | ND.     | ND.                             |
| 11                 | 2-Chloroethanol     | 0.10    | 35.3                            |
| 12                 | 1,3-Propanediol     | 0.10    | 30.0                            |
| 13                 | 1,3-Butanediol      | 0.03    | 7.96                            |
| 14                 | Ethylbenzene        | 0.09    | 23.9                            |
| 15                 | P-Xylene            | 0.29    | 73.2                            |
| 16                 | Toluene             | 0.42    | 107.7                           |
| 17                 | Cyclohexane         | 0.21    | 49.1                            |
| 18                 | Cyclohexylamine     | 0.12    | 30.4                            |
| 19                 | Water               | ND.     | ND.                             |
| 20                 | Formic acid         | 0.07    | 24.5                            |

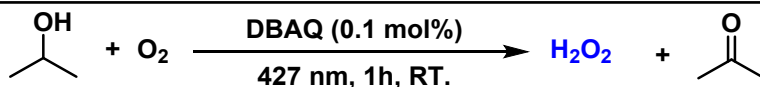

<sup>a</sup> Unless otherwise specified, different kinds of HADs (40.0 mmol), DBAQ (0.04 mmol, 0.1 mol %) were added to 10 mL vial equipped with a stirring bar. The mixture was sonicated to dissolve

completely. Then, the mixture was stirred under O<sub>2</sub> atmosphere with exposure to 40W Blue LED light (427 nm) at room temperature for 1 h.

**Table S5.** The effect of reaction time on H<sub>2</sub>O<sub>2</sub> concentration in DBAQ system under intermittent conditions

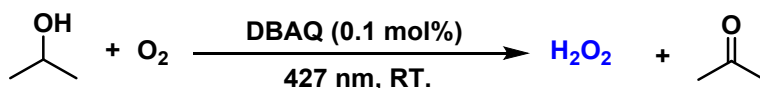

| Time(h) <sup>a</sup> | wt%(H <sub>2</sub> O <sub>2</sub> ) | c(H <sub>2</sub> O <sub>2</sub> )/(mM) |
|----------------------|-------------------------------------|----------------------------------------|
| 1                    | 2.52                                | 577.8                                  |
| 2                    | 3.48                                | 803.6                                  |
| 3                    | 4.04                                | 932.9                                  |
| 4                    | 4.76                                | 1099.2                                 |
| 5                    | 5.00                                | 1154.6                                 |
| 6                    | 5.64                                | 1302.4                                 |
| 7                    | 5.63                                | 1300.1                                 |
| 8                    | 5.64                                | 1302.4                                 |

<sup>a</sup> Unless otherwise specified, isopropanol **1a** (4.66 g, 77.4 mmol), DBAQ (0.0774 mmol, 0.1 mol %) were added to 20 mL vial equipped with a stirring bar. The mixture was sonicated to dissolve completely. Then, the mixture was stirred under O<sub>2</sub> atmosphere with exposure to 40W Blue LED light (427 nm) at room temperature for 8 h.

**Table S6.** Investigation of the effect of KOH addition on H<sub>2</sub>O<sub>2</sub> production.

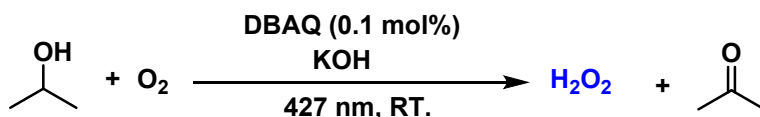

| Entry <sup>a</sup> | equiv. | wt%(H <sub>2</sub> O <sub>2</sub> ) | Generation rate of 2a (mM/h) |
|--------------------|--------|-------------------------------------|------------------------------|
| 1                  | 1%     | 1.94                                | 446.8                        |
| 2                  | 2%     | 1.27                                | 293.3                        |
| 3                  | 3%     | 1.09                                | 251.7                        |
| 4                  | 4%     | 0.46                                | 106.2                        |

<sup>a</sup> Unless otherwise specified, isopropanol **1a** (2.33 g, 38.7 mmol), DBAQ (0.0387 mmol, 0.1 mol %) and different equivalents of KOH were added to 10 mL vial equipped with a stirring bar. The mixture was sonicated to dissolve completely. Then, the mixture was stirred under O<sub>2</sub> atmosphere with exposure to 40W Blue LED light (427 nm) at room temperature for 1 h.

**Table S7.** Investigation of the effect of phosphoric acid addition on H<sub>2</sub>O<sub>2</sub> production.

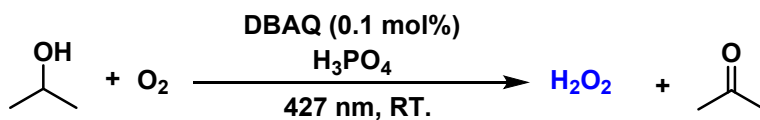

| Entry <sup>a</sup> | equiv. | wt%(H <sub>2</sub> O <sub>2</sub> ) | Generation rate of 2a (mM/h) |
|--------------------|--------|-------------------------------------|------------------------------|
| 1                  | 0      | 2.58                                | 594.6                        |
| 2                  | 0.05%  | 2.54                                | 586.6                        |
| 3                  | 0.1%   | 3.03                                | 699.7                        |
| 4                  | 0.25%  | 2.90                                | 669.6                        |
| 5                  | 0.5%   | 2.61                                | 602.7                        |
| 6                  | 0.75%  | 2.67                                | 616.5                        |
| 7                  | 1.0%   | 2.15                                | 496.5                        |
| 8                  | 12.8%  | 2.27                                | 524.2                        |
| 9                  | 22.3%  | 1.57                                | 362.5                        |
| 10                 | 30.4%  | 1.02                                | 235.6                        |
| 11                 | 36.8%  | 0.61                                | 141.8                        |

<sup>a</sup> Unless otherwise specified, isopropanol **1a** (2.33 g, 38.7 mmol), DBAQ (0.0387 mmol, 0.1 mol %) and different equivalents of H<sub>3</sub>PO<sub>4</sub> were added to 10 mL vial equipped with a stirring bar. The mixture was sonicated to dissolve completely. Then, the mixture was stirred under O<sub>2</sub> atmosphere with exposure to 40W Blue LED light (427 nm) at room temperature for 1 h.



## 5. Calculations about residence time<sup>5</sup>

Calculation of residence time in continuous flow reactor

$$\text{Total residence time} = N \times \frac{V_1}{v_{liq,R} + v_{gas,R}} \quad (\text{a})$$

$$\text{Total time} = N \times \frac{V_2}{v_{liq,R}} \quad (\text{b})$$

$$\text{Total residence time} = \text{Total time} \times \frac{V_1}{V_2} \times \frac{v_{liq,R}}{v_{liq,R} + v_{gas,R}} \quad (\text{c})$$

$$\text{Total residence time} = \text{Total time} \times \frac{V_1}{V_2} \times \frac{V_L}{V_L + \frac{T^* \times P}{T \times P^*} \times V_g} \quad (\text{d})$$

N—Total circulation times of liquid phase in reactor.

V<sub>1</sub>—Total liquid holding volume of micro reactor (2.5 mL).

V<sub>2</sub>—Total volume of organic reaction solution.

v<sub>liq</sub>—Flow rate of liquid phase(mL/min)

v<sub>gas</sub>—Flow rate of gas phase(mL/min)

T—273 K

T\*—Reaction temperature.

P—0.1 Mpa

P\*—Reaction pressure.

## 6. Reaction process detection and mechanism exploration

Monitoring of H<sub>2</sub>O<sub>2</sub> concentration over time

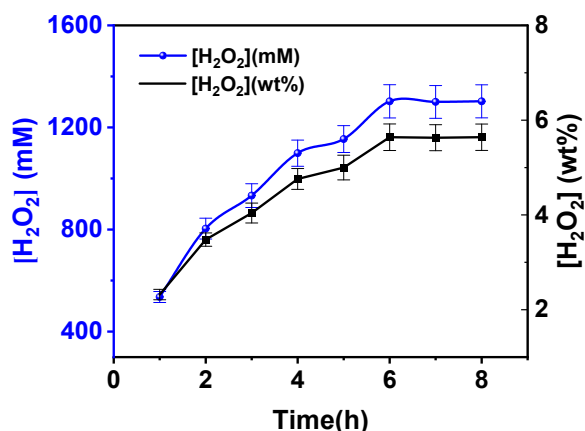

**Fig. S3** The effect of reaction time on H<sub>2</sub>O<sub>2</sub> concentration in DBAQ system under intermittent conditions.

### HRMS spectra of key intermediates

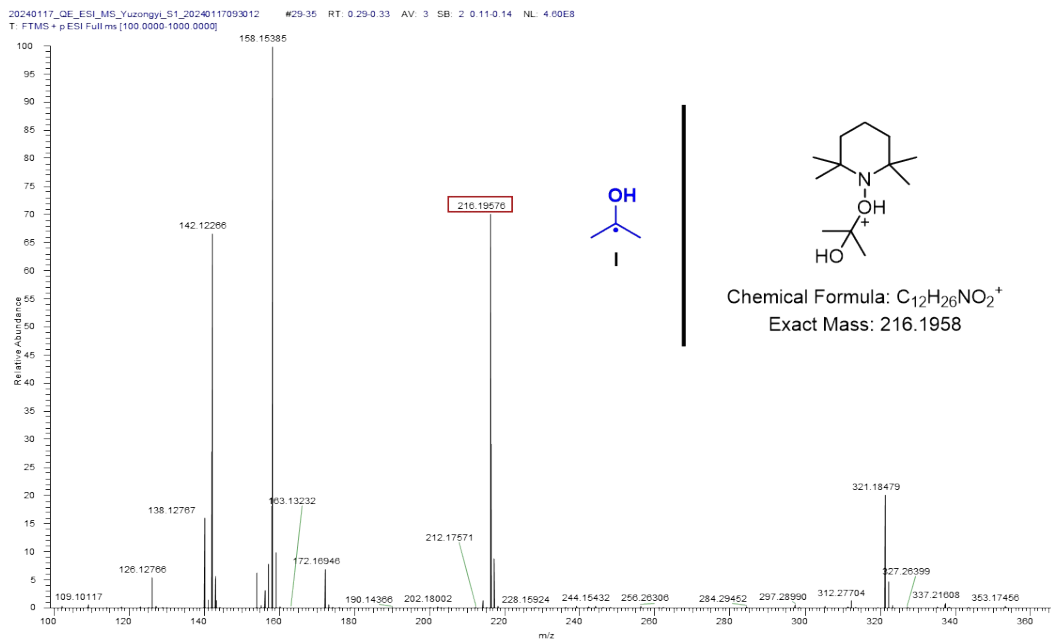

**Fig. S4** The HRMS spectrum of the intermittent I adduction with TEMPO in the photocatalytic process. HRMS (m/z): (ESI) calcd. for C<sub>12</sub>H<sub>26</sub>NO<sub>2</sub><sup>+</sup> [M + H]<sup>+</sup>: 216.1958, found: 216.19576.

### Detection of superoxide radical anion (O<sub>2</sub><sup>-·</sup>) by EPR test.

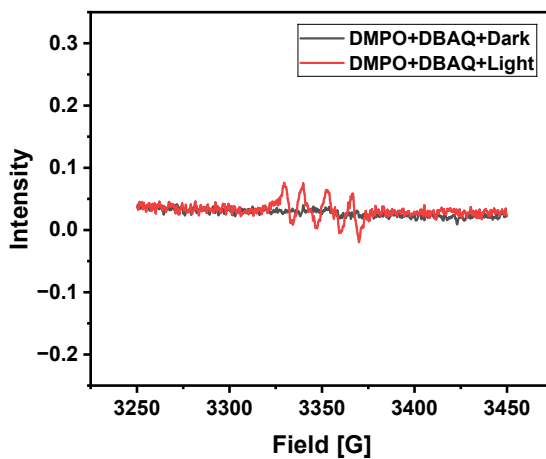

**Fig. S5** EPR test of the photocatalytic system to detect the generation of superoxide radical anion (O<sub>2</sub><sup>-·</sup>) under the irradiation.

**Table S8.** Summary of the photocatalytic production of H<sub>2</sub>O<sub>2</sub> photocatalysts.

| Catalyst                                                                      | Reaction solution              | Wave length | Light source & power | H <sub>2</sub> O <sub>2</sub> yield |
|-------------------------------------------------------------------------------|--------------------------------|-------------|----------------------|-------------------------------------|
| TiO <sub>2</sub> <sup>6</sup>                                                 | benzyl alcohol                 | λ>280 nm    | 300W Xe Lamp         | 3.3 mM/h                            |
| CQD/TiO <sub>2</sub> <sup>7</sup>                                             | ethanol                        | λ>420 nm    | 300 W Xe Lamp        | 1.7 mM/h                            |
| CoPi/rGO/TiO <sub>2</sub> <sup>8</sup>                                        | 2-propanol                     | λ>320 nm    | 200 W mercury lamp   | 1.5 mM/h                            |
| KH <sub>2</sub> PO <sub>4</sub> /g-C <sub>3</sub> N <sub>4</sub> <sup>9</sup> | ethanol                        | λ>420 nm    | 300 W Xe Lamp        | 0.5 mM/h                            |
| g-C <sub>3</sub> N <sub>4</sub> -carbon <sup>10</sup>                         | water + 2-propanol             | λ>280 nm    | 200 W Xe Lamp        | 0.3 mM/h                            |
| AQ-augmented g-C <sub>3</sub> N <sub>4</sub> <sup>11</sup>                    | 2-propanol                     | AM 1.5G     | 150 W Xenon Arc Lamp | 0.4 mM/h                            |
| Au/BiVO <sub>4</sub> <sup>12</sup>                                            | water + EtOH                   | λ>420 nm    | 2000 W Xe lamp       | 4.0 mM/h                            |
| Silica/graphene oxide/CdS <sup>13</sup>                                       | ethanol                        | λ=635 nm    | 300 W Xe Lamp        | 90.0 μM/h                           |
| Graphene oxide <sup>14</sup>                                                  | water                          | λ>420 nm    | 300W Xe Lamp         | 33.3 μM/h                           |
| CdS-graphene <sup>15</sup>                                                    | water + methanol               | AM 1.5G     | 300W Xe Lamp         | 10.7 μM/h                           |
| rGO/Cd <sub>3</sub> (TMT) <sub>2</sub> <sup>16</sup>                          | water + methanol               | λ>420 nm    | 300W Xe Lamp         | 0.3 mM/h                            |
| Ni/MIL-125-NH <sub>2</sub> <sup>17</sup>                                      | benzyl alcohol                 | λ>420 nm    | 500W Xe Lamp         | 1.0 mM/h                            |
| AQ Polymers <sup>18</sup>                                                     | water                          | λ>400 nm    | 300W Xe Lamp         | 3.2 mM/h                            |
| Phenanthrenequinone Polymer s <sup>19</sup>                                   | water                          | λ>400 nm    | 300W Xe Lamp         | 3.0 mM/h                            |
| Resins <sup>20</sup>                                                          | water                          | λ>420 nm    | 500 W Xe lamp        | 4.1 μM/h                            |
| 2-Ethylanthraquinone <sup>21</sup>                                            | Mesitylene+ trioctyl phosphate | AM 1.5G     | 300W Xe Lamp         | 15.2 mM/h                           |
| 2-Ethylanthraquinone <sup>22</sup>                                            | ethanol                        | AM 1.5G     | 300W Xe Lamp         | 25.2 mM/h                           |
| 2-tert-Butylanthraquinone <sup>23</sup>                                       | toluene                        | 395 nm      | 50W LED              | 28.0 mM/h                           |
| <sup>24</sup>                                                                 | benzyl alcohol                 | λ< 400 nm   | 300W Xe Lamp         | 176.4 mM/h                          |
| This work                                                                     | isopropanol                    | 427 nm      | 40W LED              | 621.2 mM/h                          |



## 7. DFT-Calculation details

All the BDFE of HADs were calculated by Gaussian 09W, Opt+Freq was used to obtain the optimized configuration<sup>25, 26</sup>. The detailed settings of the calculation process are shown in **Fig. S6**

Method:

Basis Set:   (  ,  )

Charge:  Spin:

**Fig. S6** Detailed settings of the DFT calculation.

## 8. NMR spectrum

<sup>1</sup>H-NMR spectra of 2,6-Di-tert-butylanthracene.

<sup>1</sup>H NMR (400 MHz, Chloroform-*d*)  $\delta$  8.32 (s, 2H), 7.93 (d,  $J = 8.9$  Hz, 2H), 7.86 (d,  $J = 1.9$  Hz, 2H), 7.54 (dd,  $J = 8.9, 2.0$  Hz, 2H), 1.44 (s, 18H).

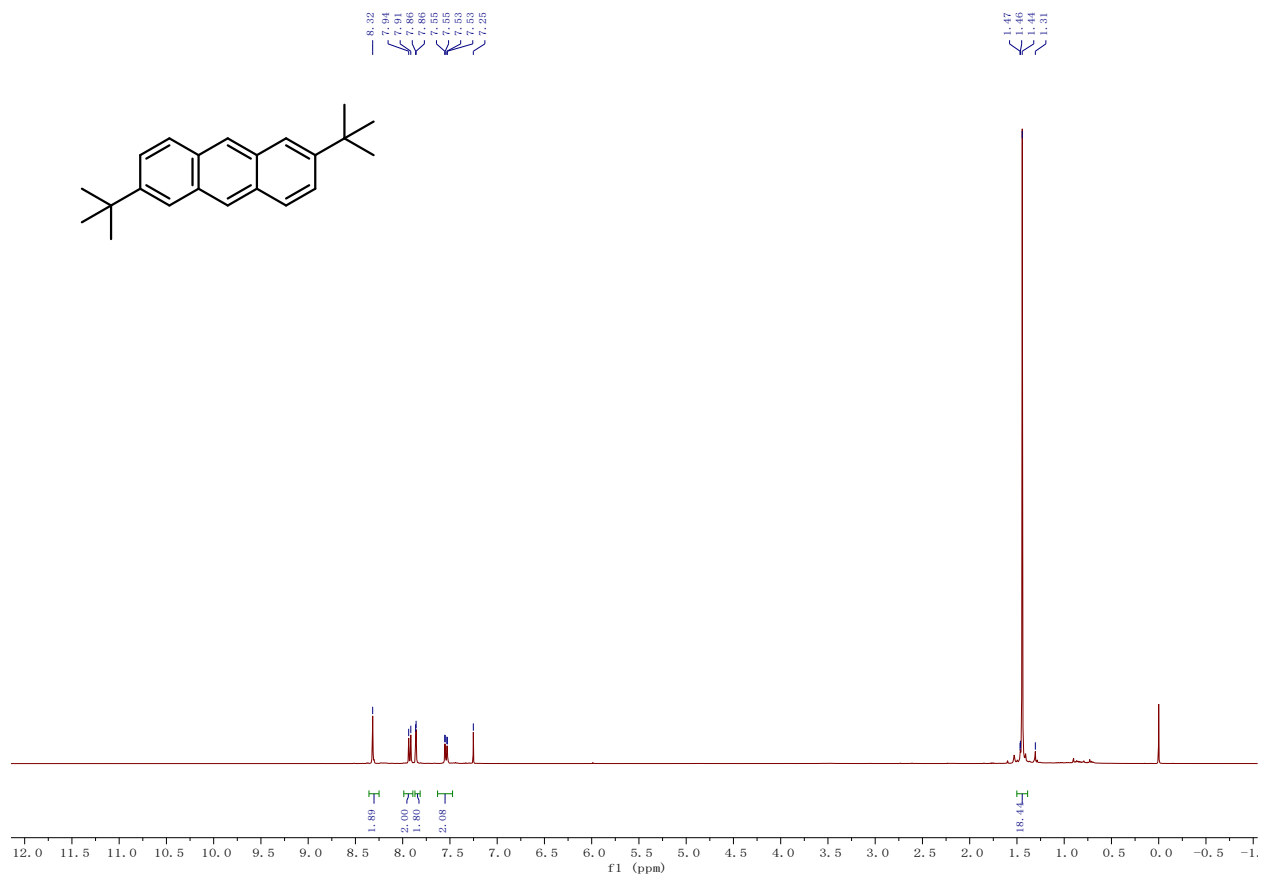

<sup>1</sup>H-NMR spectra of 2,6-Di-tert-butylantraquinone (DBAQ)

<sup>1</sup>H NMR (500 MHz, Chloroform-*d*) δ 8.32 (d, *J* = 2.1 Hz, 2H), 8.25 (d, *J* = 8.2 Hz, 2H), 7.82 (dd, *J* = 8.2, 2.1 Hz, 2H), 1.42 (s, 18H).

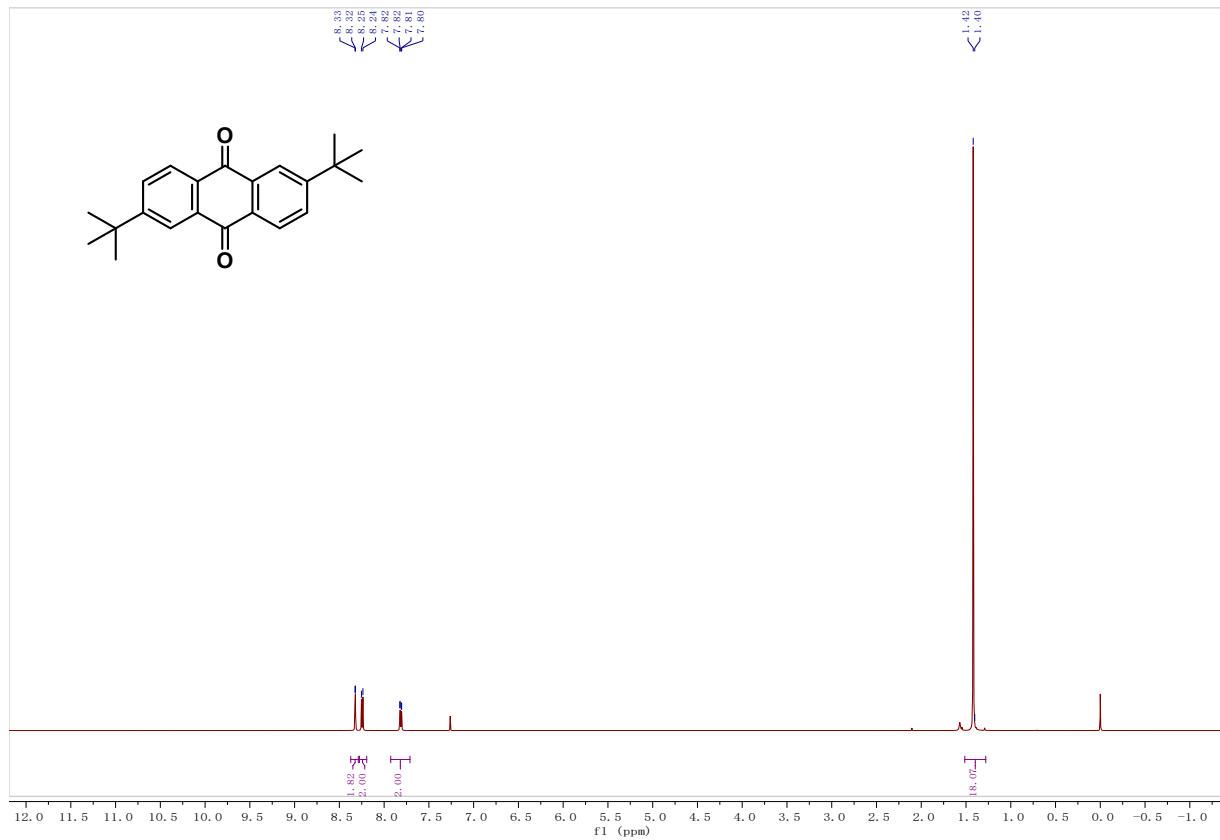

## 9. Reagents used in the experimental section

**Table S9.** List of reagents used in the experimental section.

| Name of reagent <sup>a</sup>  | Purity | Manufacturer information                         |
|-------------------------------|--------|--------------------------------------------------|
| 2,6-Di-tert-butylantraquinone | 99%    | Homemade, batch number [YZY20230112]             |
| 2-Methylantrone               | 98%    | Shanghai Aladdin Biochemical Technology Co., Ltd |
| 2-Dert-butylantraquinone      | 98%    | Shanghai Aladdin Biochemical Technology Co., Ltd |
| 2-Ethylantrone                | 98%    | Shanghai Aladdin Biochemical Technology Co., Ltd |
| 2-Tert-pentanylantraquinone   | 98%    | Shanghai Aladdin Biochemical Technology Co., Ltd |
| Anthraquinone                 | 98%    | Shanghai Aladdin Biochemical Technology Co., Ltd |
| 2-Brochantraquinone           | 98%    | Shanghai Anji Medical Chemical Co., Ltd          |
| 1,5-dichloroanthraquinone     | 98%    | Shanghai Anji Medical Chemical Co., Ltd          |
| 2-Chlorantrone                | 98%    | Shanghai Aladdin Biochemical Technology Co., Ltd |
| 2,6-Dibromantraquinone        | 98%    | Shanghai Aladdin Biochemical Technology Co., Ltd |
| 9-Thiotonone                  | 98%    | Shanghai Aladdin Biochemical Technology Co., Ltd |
| 1,8-Dichlorananquinone        | 98%    | Shanghai Aladdin Biochemical Technology Co., Ltd |
| 2-Hydroxyantrone              | 98%    | Shanghai Aladdin Biochemical Technology Co., Ltd |
| Alizarin                      | 98%    | Shanghai Anji Medical Chemical Co., Ltd          |
| Emodin                        | 98%    | Shanghai Anji Medical Chemical Co., Ltd          |
| 2,6-Diaminoanthraquinone      | 98%    | Shanghai Aladdin Biochemical Technology Co., Ltd |
| Alcohol                       | AR     | Tianli Chemical Reagents Co., Ltd                |
| Isopropanol                   | AR     | Tianjin Fuyu Fine Chemical Co., Ltd              |
| n-Butyl alcohol               | AR     | Tianjin Fuyu Fine Chemical Co., Ltd              |
| 2-Butanol                     | AR     | Tianjin Fuyu Fine Chemical Co., Ltd              |
| 1,3-Propylene glycol          | AR     | Tianjin Fuyu Fine Chemical Co., Ltd              |
| 1,3-Butanediol                | AR     | Tianjin Fuyu Fine Chemical Co., Ltd              |
| Cyclohexanol                  | AR     | Tianjin Fuyu Fine Chemical Co., Ltd              |
| Cyclohexane                   | AR     | Tianjin Fuyu Fine Chemical Co., Ltd              |
| Cyclohexylamine               | AR     | Tianjin Fuyu Fine Chemical Co., Ltd              |
| Methylbenzene                 | AR     | Tianjin Fuyu Fine Chemical Co., Ltd              |
| Benzil alcohol                | AR     | Shanghai Aladdin Biochemical Technology Co., Ltd |
| 1-Benzoethanol                | AR     | Shanghai Aladdin Biochemical Technology Co., Ltd |
| 2-Benzoethanol                | AR     | Shanghai Aladdin Biochemical Technology Co., Ltd |
| 1-Phenylpropanol              | AR     | Shanghai Aladdin Biochemical Technology Co., Ltd |
| p-Xylene                      | AR     | Tianjin Fuyu Fine Chemical Co., Ltd              |
| Oxygen                        | 99.99% | Dalian Guangming Special Gas Co., LTD            |
| Nitrogen                      | 99.99% | Dalian Guangming Special Gas Co., LTD            |
| Air                           | 99.99% | Dalian Guangming Special Gas Co., LTD            |

<sup>a</sup> Unless otherwise specified, the reagents used in the experiments were either provided by the aforementioned manufacturers or self-prepared and without further purified.

## References:

1. J. Lee, Y. Chen, J. S. Lin, C. Wu, C. Chen, C. Dai, C. Chao, H. Chen and W. Liao, *Tetrahedron*, 2011, **67**, 1696-1702.
2. M. V. Niladari Raju, M. E. Mohanty, P. R. Bangal and J. R. Vaidya, *J. Phys. Chem. C*, 2015, **119**, 8563-8575.
3. H. B. Vibbert, C. Bendel, J. R. Norton and A. J. Moment, *ACS Sustain. Chem. Eng.*, 2022, **10**, 11106-11116.
4. Z. Yu, J. Zhao, Y. Wu, L. Guo, C. Ma, H. Zhu, J. Li, L. Duan, Z. Liu, H. Sun, G. Zhao and Q. Meng, *ACS Sustain. Chem. Eng.*, 2023, **11**, 13320-13332.
5. R. D. Bach and O. Dmitrenko, *J. Am. Chem. Soc.*, 2004, **126**, 4444-4452.
6. Y. Shiraishi, S. Kanazawa, D. Tsukamoto, A. Shiro, Y. Sugano and T. Hirai, *ACS Catal.*, 2013, **3**, 2222-2227.
7. R. Ma, L. Wang, H. Wang, Z. Liu, M. Xing, L. Zhu, X. Meng and F. Xiao, *Appl. Catal. B: Environ.*, 2019, **244**, 594-603.
8. G. Moon, W. Kim, A. D. Bokare, N. Sung and W. Choi, *Energ. Environ. Sci.*, 2014, **7**, 4023-4028.
9. J. Tian, T. Wu, D. Wang, Y. Pei, M. Qiao and B. Zong, *Catal. Today.*, 2019, **330**, 171-178.
10. R. Wang, X. Zhang, F. Li, D. Cao, M. Pu, D. Han, J. Yang and X. Xiang, *J. Energy Chem.*, 2018, **27**, 343-350.
11. H. Kim, Y. Choi, S. Hu, W. Choi and J. Kim, *Appl. Catal. B: Environ.*, 2018, **229**, 121-129.
12. H. Hirakawa, S. Shiota, Y. Shiraishi, H. Sakamoto, S. Ichikawa and T. Hirai, *ACS Catal.*, 2016, **6**, 4976-4982.
13. H. Kim, O. S. Kwon, S. Kim, W. Choi and J. Kim, *Energ. Environ. Sci.*, 2016, **9**, 1063-1073.
14. W. Hou and Y. Wang, *ACS Sustain. Chem. Eng.*, 2017, **5**, 2994-3001.
15. S. Thakur, T. Kshetri, N. H. Kim and J. H. Lee, *J. Catal.*, 2017, **345**, 78-86.
16. J. Xu, Z. Chen, H. Zhang, G. Lin, H. Lin, X. Wang and J. Long, *Sci. Bull.*, 2017, **62**, 610-618.
17. Y. Isaka, Y. Kondo, Y. Kawase, Y. Kuwahara, K. Mori and H. Yamashita, *Chem. Commun.*, 2018, **54**, 9270-9273.
18. X. Xu, R. Sa, W. Huang, Y. Sui, W. Chen, G. Zhou, X. Li, Y. Li and H. Zhong, *ACS Catal.*, 2022, **12**, 12954-12963.
19. X. Xu, H. Zhong, W. Huang, Y. Sui, R. Sa, W. Chen, G. Zhou, X. Li, D. Li, M. Wen and B. Jiang, *Chem. Eng. J.*, 2023, **454**, 139929.
20. Y. Shiraishi, T. Takii, T. Hagi, S. Mori, Y. Kofuji, Y. Kitagawa, S. Tanaka, S. Ichikawa and T. Hirai, *Nat. Mater.*, 2019, **18**, 985-993.
21. M. Ren, M. Mao, X. Duan and Q. Song, *J. Photochem. Photobiol. A: Chem.*, 2011, **217**, 164-168.
22. G. Xu, Y. Liang and F. Chen, *J. Mol. Catal. A-Chem.*, 2016, **420**, 66-72.
23. H. B. Vibbert, C. Bendel, J. R. Norton and A. J. Moment, *ACS Sustain. Chem. Eng.*, 2022, **10**, 11106-11116.
24. H. Zhang, M. Liu, Q. Miao, P. Wu, C. Liu, and W. Jiang, Sustainable H<sub>2</sub>O<sub>2</sub> Photosynthesis by Sunlight and Air. *Chem. Eng. J.*, 2023, **455**, 140649.
25. M.J. Frisch, G.W. Trucks, H.B. Schlegel, G.E. Scuseria, M.A. Robb, J.R. Cheeseman, G. Scalmani, V. Barone, G.A. Petersson, and H. Nakatsuji, Gaussian 16 Revision C. 01, 2016. Gaussian Inc. Wallingford CT 1 (2016) 572.
26. T. Lu, and F. Chen, Multiwfn: A multifunctional wavefunction analyzer. *J. Comput. Chem.*, 2012, **33**, 580-592.
