# Supplementary material for: Continuous photocatalytic preparation of hydrogen peroxide with anthraquinone photosensitizers
Source: Royal Society of Chemistry journal article supplement (doi:10.1039/d4gc02385d), 2024-01-01

Electronic Supplementary Material (ESI) for Green Chemistry.  
This journal is © The Royal Society of Chemistry 2024

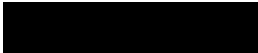

Supplement: d4gc02385d4.pdf [file d4gc02385d4.pdf]
