# Supplementary figures and images for: Continuous photocatalytic preparation of hydrogen peroxide with anthraquinone photosensitizers
Source: Royal Society of Chemistry journal article supplement (doi:10.1039/d4gc02385d), 2024-01-01

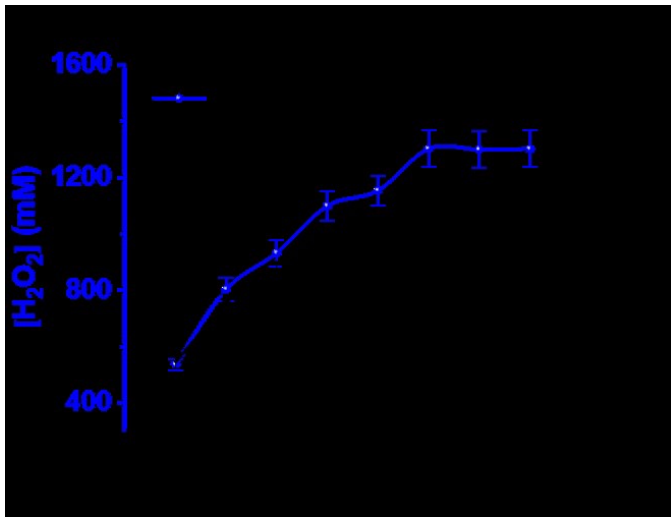

Supplement: d4gc02385d5.pdf [file d4gc02385d5.pdf]

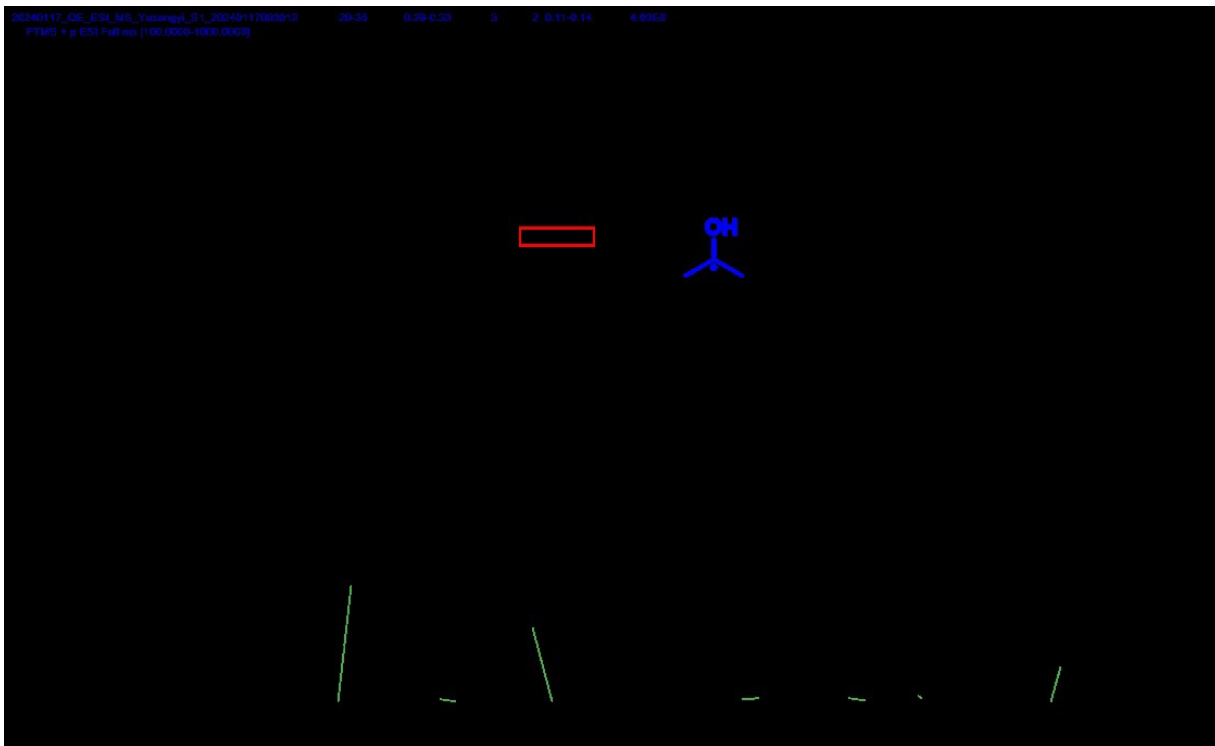

Supplement: d4gc02385d6.pdf [file d4gc02385d6.pdf]

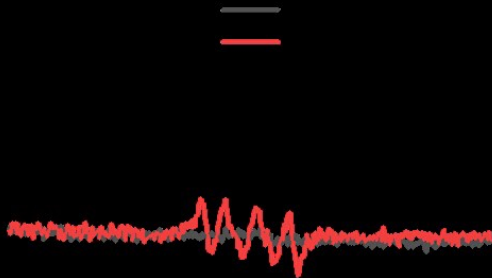

Supplement: d4gc02385d7.pdf [file d4gc02385d7.pdf]
